# Supplementary material for: Noncytolytic CD8+ Cell Mediated Antiviral Response Represents a Strong Element in the Immune Response of Simian Immunodeficiency Virus-Infected Long-Term Non-Progressing Rhesus Macaques
Source: PLOS journal article supplement (doi:10.1371/journal.pone.0142086), 2015-11-09

## Supplementary Figure

**S2. Flow cytometry gating strategy for CD8<sup>+</sup> and CD4<sup>+</sup> CD8<sup>+</sup> DP transitional memory cells as well as CD8<sup>+</sup> and CD4<sup>+</sup> CD8<sup>+</sup> DP PD-1<sup>+</sup> cells.** Representative gating of T cell subsets in whole blood. Excision of duplets (a singlet gate) was followed by gating on lymphocytes and subsequent gating on CD3<sup>+</sup> T cells. T cells were further divided into CD4<sup>+</sup>, CD8<sup>+</sup> and CD4<sup>+</sup> CD8<sup>+</sup> DP cells. CD8<sup>+</sup> and CD4<sup>+</sup> CD8<sup>+</sup> DP transitional memory cells were identified by gating on CD197<sup>-</sup> CD45RA<sup>-</sup> CD28<sup>-</sup> CD27<sup>+</sup> cells.

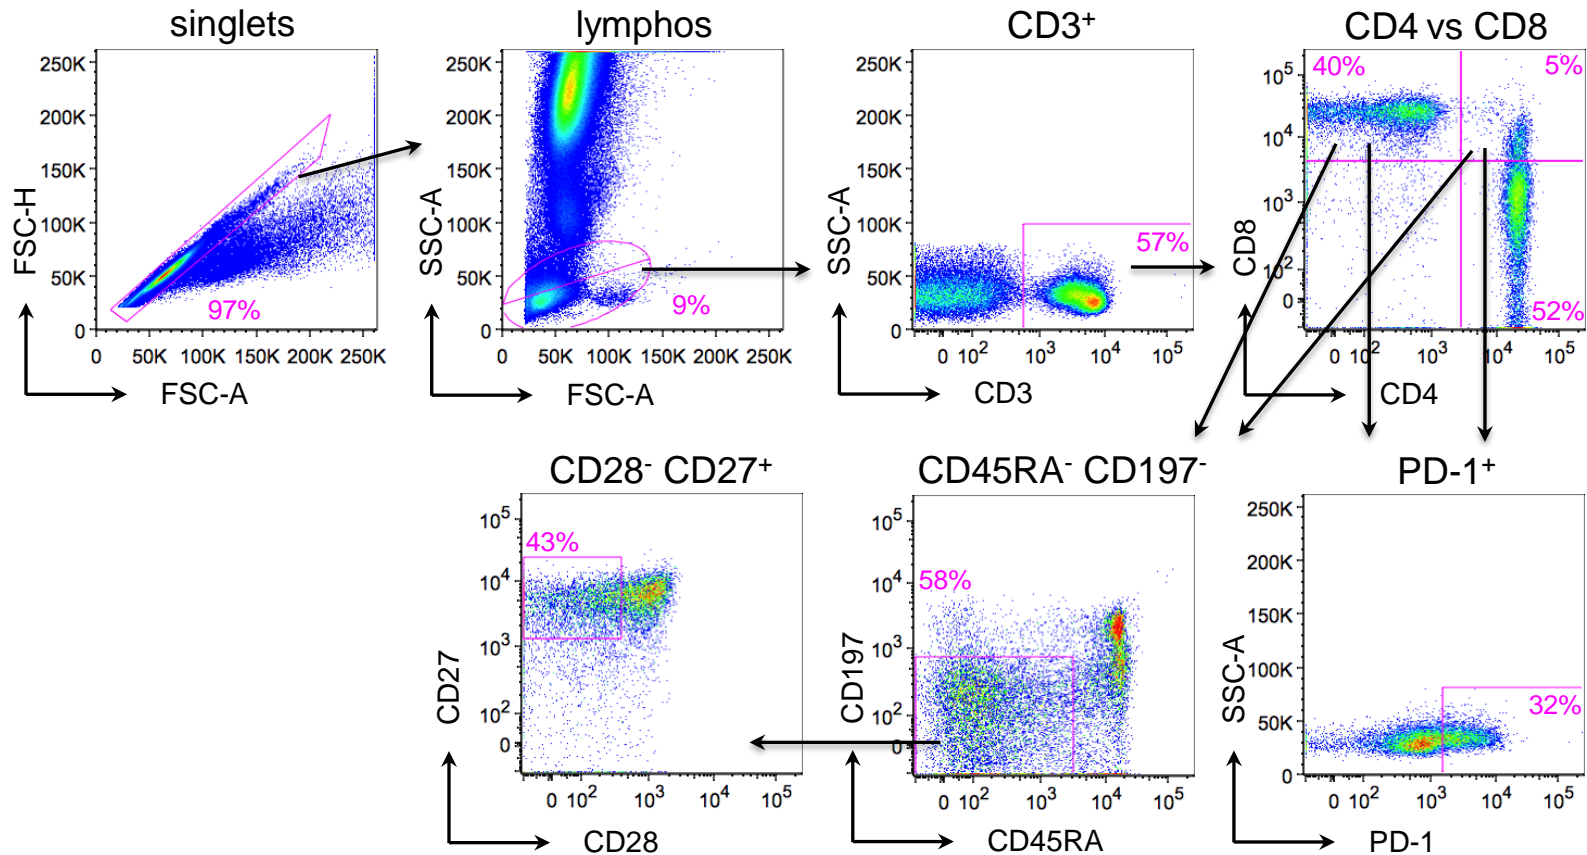

Supplement: S3 (10.1371/journal.pone.0142086.s003) [file journal.pone.0142086.s003]
